# Supplementary material for: Photocatalytic Materials Based on g-C3N4 Obtained by the One-Pot Calcination Method
Source: MDPI journal article supplement (doi:10.3390/c9030085), 2023-09-02
Supplement: s1 [file s1]

Table S1. Crystalline phases parameters.\*

| Sample                                                            | Miller Indexes of g-C <sub>3</sub> N <sub>4</sub> phase peaks | angle 2 $\theta$ , ° | CrySizeL (nm) | LVol-IB (nm) | Lvol-FWHM (nm) |
|-------------------------------------------------------------------|---------------------------------------------------------------|----------------------|---------------|--------------|----------------|
| g-C <sub>3</sub> N <sub>4</sub>                                   | 100                                                           | 13.34(1)             | 3.6(1)        | 2.27(7)      | 3.2(1)         |
|                                                                   | 002                                                           | 27.446(2)            | 7.08(3)       | 4.51(2)      | 6.30(2)        |
|                                                                   |                                                               |                      | CrySizeG (nm) | LVol-IB (nm) | Lvol-FWHM (nm) |
| ZnIn <sub>2</sub> S <sub>4</sub> /g-C <sub>3</sub> N <sub>4</sub> | 002                                                           | 27.639(8)            | 8.5(2)        | 8.0(2)       | 7.5(2)         |
| CdZnS/g-C <sub>3</sub> N <sub>4</sub>                             | 100                                                           | 13.99(8)             | 1.29(6)       | 1.22(6)      | 1.15(6)        |
|                                                                   | 002                                                           | 27.444(5)            | 9.7(1)        | 9.2(1)       | 8.6(1)         |

Other phases

| Sample                                                            | Miller Indexes of phase peaks | angle 2 $\theta$ , ° | CrySizeG (nm) | LVol-IB (nm) | Lvol-FWHM (nm) |
|-------------------------------------------------------------------|-------------------------------|----------------------|---------------|--------------|----------------|
| ZnIn <sub>2</sub> S <sub>4</sub> /g-C <sub>3</sub> N <sub>4</sub> | 005                           | 22.92(1)             | 4.7(1)        | 4.4(1)       | 4.2(1)         |
|                                                                   | 102                           | 28.19(5)             | 4.8(1)        | 4.4(1)       | 4.2(1)         |
|                                                                   | 110                           | 47.731(3)            | 10.06(9)      | 9.45(8)      | 8.96(8)        |
| CdZnS/g-C <sub>3</sub> N <sub>4</sub>                             | 100                           | 25.71(1)             | 15.9(12)      | 14.9(11))    | 14.1(10)       |
|                                                                   | 002                           | 26.22(4)             | 5.9(2)        | 5.6(2)       | 5.3(2)         |
|                                                                   | 101                           | 28.895(9)            | 5.14(5)       | 4.83(5)      | 4.58(5)        |
|                                                                   | 110                           | 45.403(5)            | 6.12(6)       | 5.75(6)      | 5.44(6)        |
|                                                                   | 103                           | 49.42(1)             | 6.0(1)        | 5.6(1)       | 5.3(1)         |

\*The crystallite size calculations were performed in several ways [28]: the values calculated from the half-width of the reflections (LVol-FWHM) and the integrated reflection intensity (LVol-IB) are the volume-weighted values of the crystallite sizes, and the CrySizeL parameter is the size of the crystallites in the direction perpendicular to the analyzed planes, with the Lorentz type of peak broadening.
